# Supplementary material for: A Phyllopod-Mediated Feedback Loop Promotes Intestinal Stem Cell Enteroendocrine Commitment in Drosophila
Source: PubMed Central journal article supplement — Stem Cell Reports. 2017 Dec 21;10(1):43–57. doi: 10.1016/j.stemcr.2017.11.014 (PMC5768918; doi:10.1016/j.stemcr.2017.11.014), 2017-12-21
Supplement: mmc1.pdf [file mmc1.pdf]

**Stem Cell Reports, Volume 10**

**Supplemental Information**

**A Phyllopod-Mediated Feedback Loop Promotes Intestinal Stem Cell  
Enteroendocrine Commitment in *Drosophila***

**Chang Yin and Rongwen Xi**

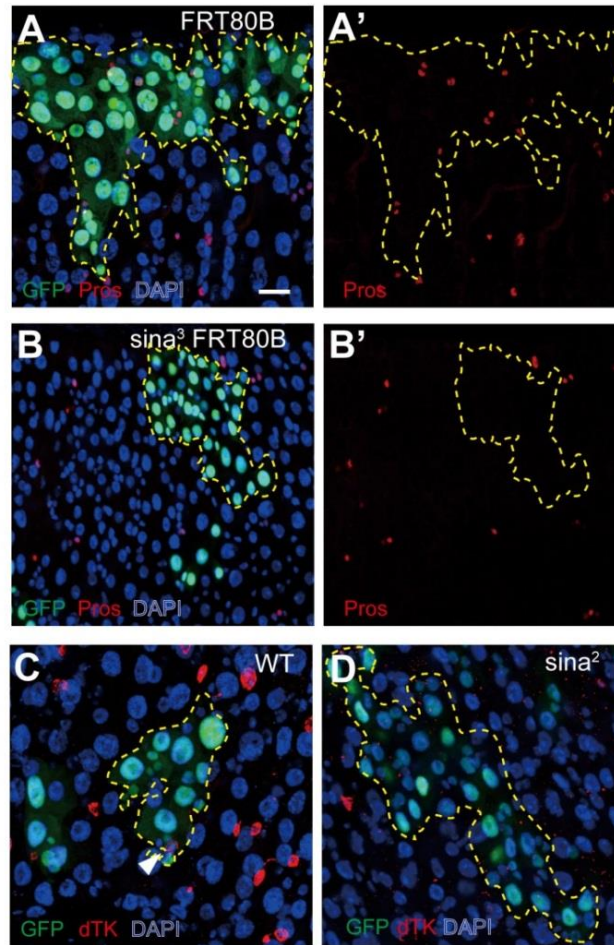

**Fig. S1, Related to Figure 1. *sina* is required for EE cell fate specification.**

Wild-type or *sina* homozygous mutant clones (GFP, green) were generated by the MARCM system and were examined on 10 day after clone induction (ACI).

(A-B') Clones co-stained with anti-Pros (red). (A,A') A wild-type *FRT80B* clone. (B,B') A *sina*<sup>3</sup> *FRT80B* clone. Note the absence of Pros<sup>+</sup> cells in *sina* mutant clones (dashed lines and the separated red channels).

(C-D) Clones co-stained with anti- dTK. (C) A wild-type clone. (D) A *sina*<sup>2</sup> clone. dTK<sup>+</sup> cells were not observed in *sina* mutant clones.

Scale bar: 20  $\mu$ m

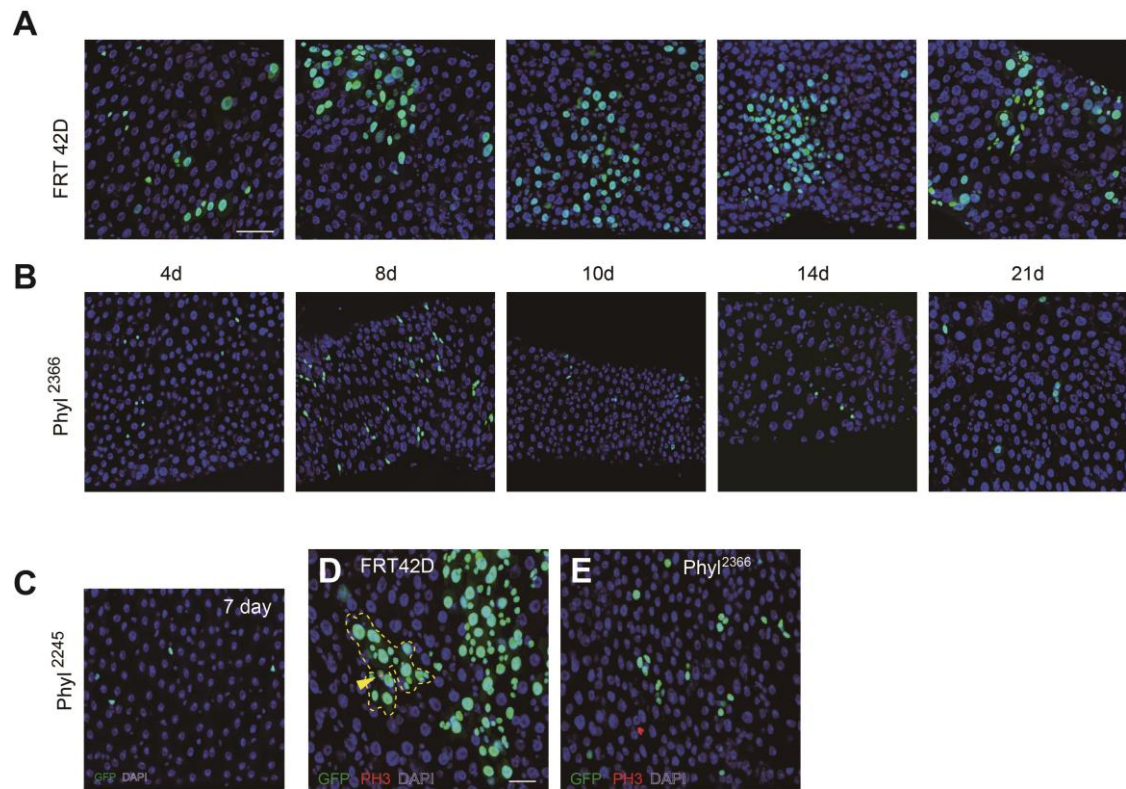

**Fig. S2, Related to Figure 1. Clonal analysis of wild-type and *phyl* mutant cells in the midgut epithelia.**

(A-B) GFP marked wild-type (upper panels) and *phyl*<sup>2366</sup> mutant (lower panels) clones (green) were generated by the MARCM system, and examined at the indicated time points (days) ACI. Nuclei were stained with DAPI (blue).

(C) GFP marked *phyl*<sup>2245</sup> mutant clones at 7 days ACI.

(D-E) Clones co-stained with PH3 to identify mitotic cells. (C) PH3<sup>+</sup> cells could be detected in some wild-type *FRT42D* clones (yellow arrowhead). (D) PH3<sup>+</sup> cells could not be detected in *phyl*<sup>2366</sup> mutant clones.

Scale bar in A: 50  $\mu$ m, in C: 20  $\mu$ m.

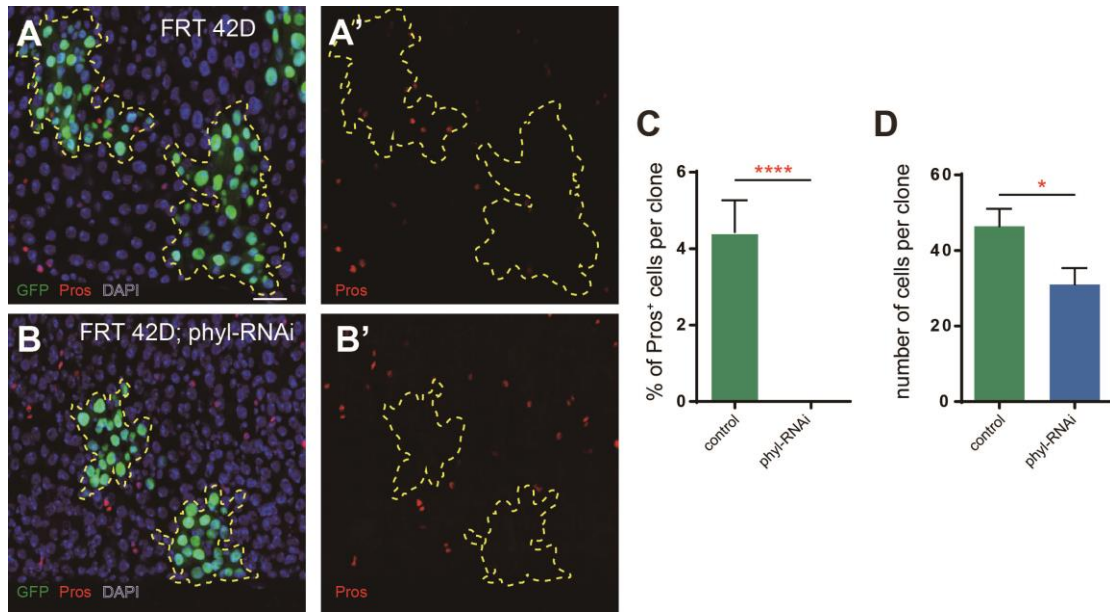

**Fig. S3, Related to Figure 1. Effects of *phyl-RNAi* on ISC proliferation and EE differentiation.**

Wild-type and *phyl-RNAi* homozygous clones (GFP, green) were generated by the MARCM system and were examined on 10 day after clone induction (ACI).

Clones were stained with anti-Pros (red). Note the absence of Pros<sup>+</sup> cells in *phyl-RNAi* clones (dashed lines and separated channels).

The proportion of Pros<sup>+</sup> cells per clone in wild-type and *phyl-RNAi* clones on days 10-14 ACI. Mean  $\pm$  s.e.m.  $n=24$  for *FRT 42D* clones,  $n=49$  for *phyl-RNAi* clones. \*\*\*\* $P<0.0001$  (Student's *t*-test).

Quantification of clone size of wild-type and *phyl-RNAi* clones on days 10-14 ACI. Mean  $\pm$  s.e.m.  $n=24$  for *FRT 42D* clones,  $n=49$  for *phyl-RNAi* clones. \* $P<0.05$  (Student's *t*-test).

Nuclei were stained with DAPI (blue). Scale bar: 20  $\mu$ m.

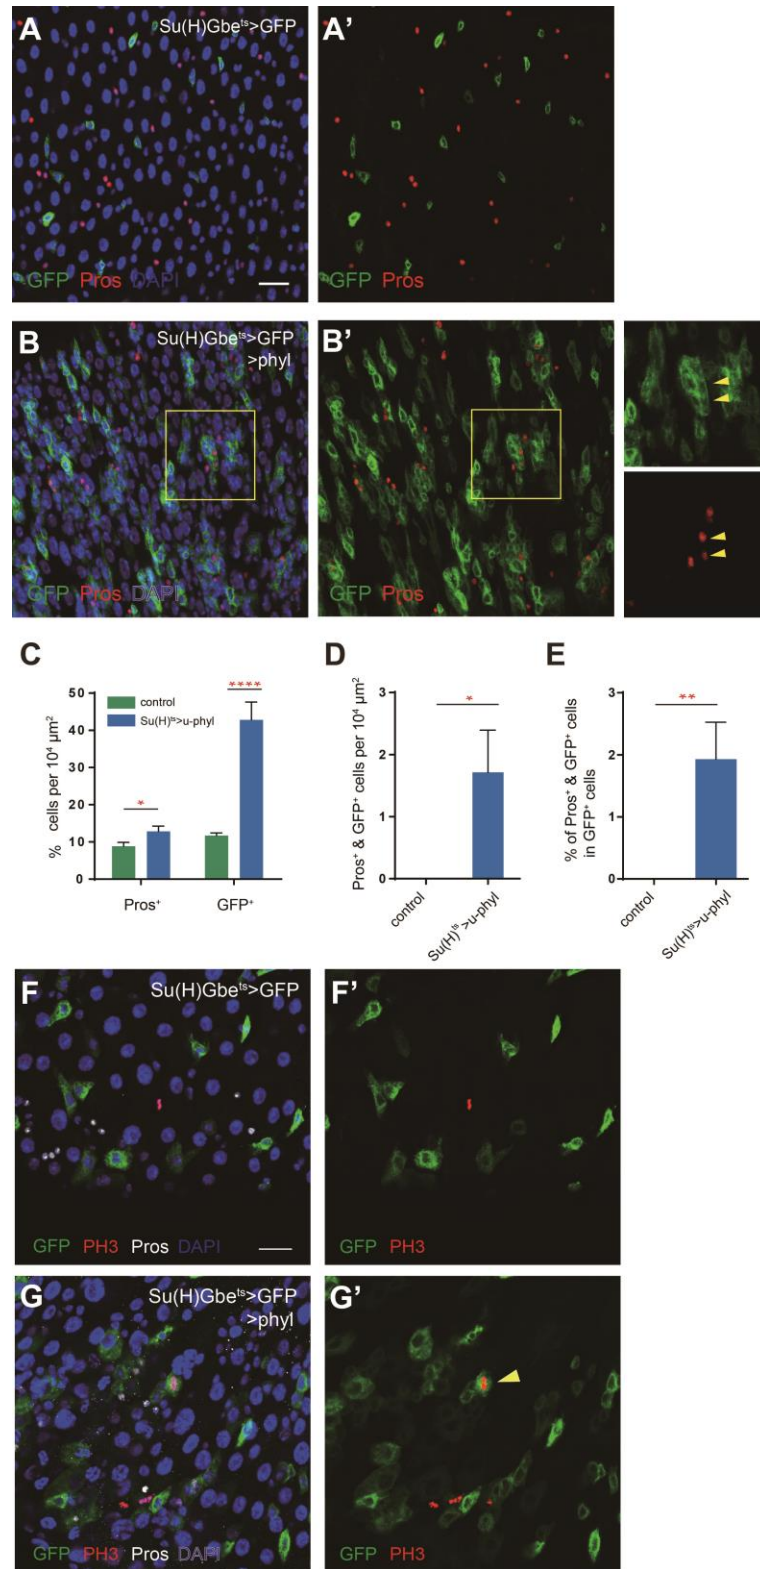

**Fig. S4, Related to Figure 2. Overexpression of *phyl* in EBs causes EB accumulation and EE fate switch.**

(A-B) Midgut epithelia of indicated genotypes stained with anti-Pros (red). Flies were shifted to the restrictive temperature for 14 days before analysis. Genotypes: *Su(H)Gbe-GAL4<sup>ts</sup>, UAS-GFP* (A); *Su(H)Gbe-GAL4<sup>ts</sup>, UAS-GFP; UAS-phyl* (B). GFP, green. Note that *phyl* overexpression causes increased number of EBs (GFP<sup>+</sup>), and some of these EBs adopt EE fate (GFP<sup>+</sup> and Pros<sup>+</sup>).

(C) Quantification of the percentage of Pros<sup>+</sup> or GFP<sup>+</sup> cells per epithelial area in the intestines of indicated genotypes.

(D) Quantification of the total number of Pros and GFP double-positive cells per epithelial area.

(E) Quantification of the percentage of Pros and GFP double-positive cells in GFP positive cells.

Mean  $\pm$  s.e.m.  $n=7$  (fields) for *Su(H)Gbe<sup>ts</sup>>GFP*;  $n=7$  for *Su(H)Gbe<sup>ts</sup> >UAS-phyl* midguts in C-E. \* $P<0.05$ , \*\* $P<0.01$ , \*\*\*\* $P<0.0001$  (Student's *t*-test).

(F-G) Mitotic cells, as indicated by PH3 staining (red, yellow arrowhead), were not present in *Su(H)Gbe<sup>ts</sup>>GFP* cells in wild-type midgut (F). Overexpression of *phyl* driven by *Su(H)Gbe<sup>ts</sup>* induced some *Su(H)Gbe>GFP* cells to re-enter mitosis (G).

Scale bars: 20  $\mu$ m.

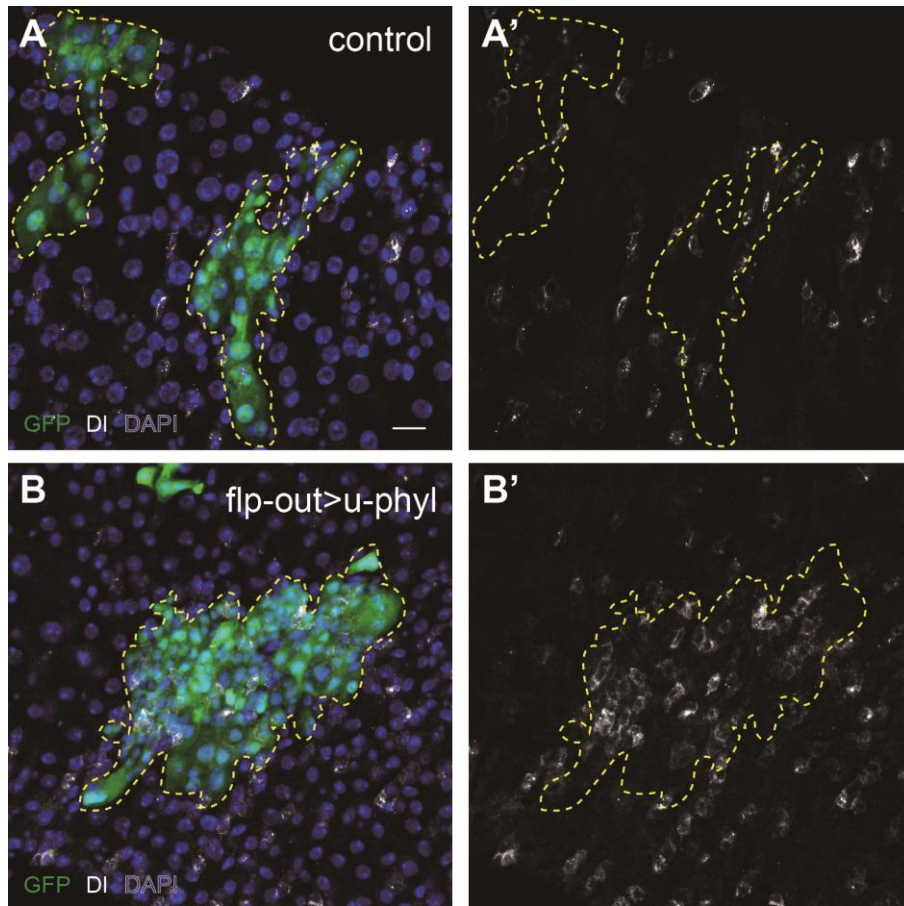

**Fig. S5, Related to Figure 2. *phyl*-overexpressed clones contain extra ISC-like cells.**

(A-B) Wild-type and *phyl* overexpression clones were generated by the flp-out system and were examined on 7 day ACI. Clones co-stained with anti-DI (white). Dashed lines depict the clone margin.

Scale bar: 20  $\mu$ m.

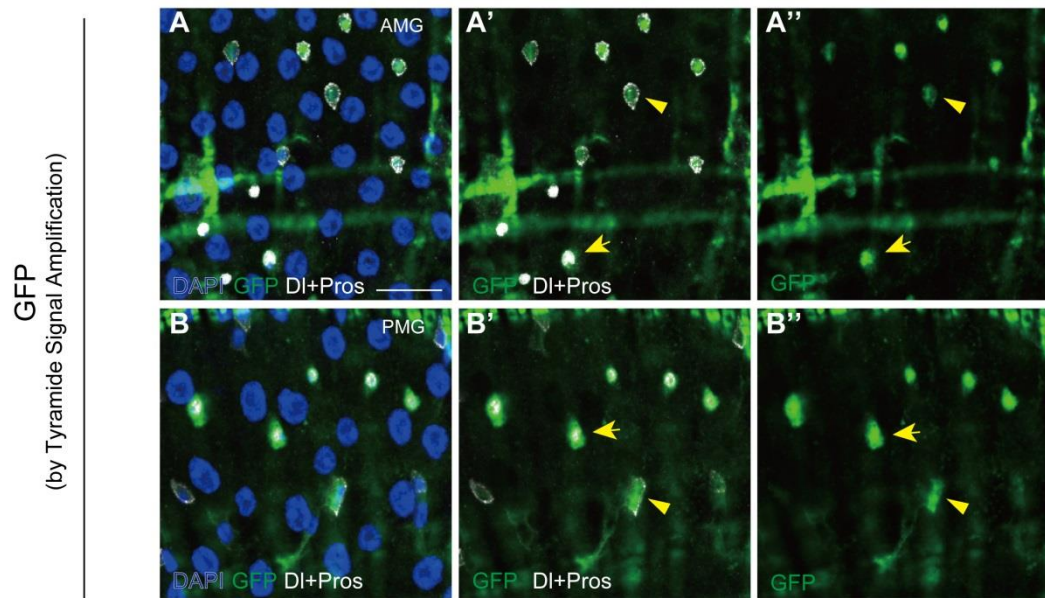

**Fig. S6, Related to Figure 5. *phyl3.4-nGFP* expression pattern detected by the TSA method.**

(A-B) The Tyramide Signal Amplification (TSA) method was used to amplify the GFP signal in *phyl<sup>3.4</sup>-nGFP* intestines. With this method, GFP signal was detected in the majority of Pros<sup>+</sup> EE s (yellow arrow) and DI<sup>+</sup> ISCs (yellow arrowhead) at both the anterior (A) and the posterior (B) midgut regions.

Scale bar: 20  $\mu$ m.

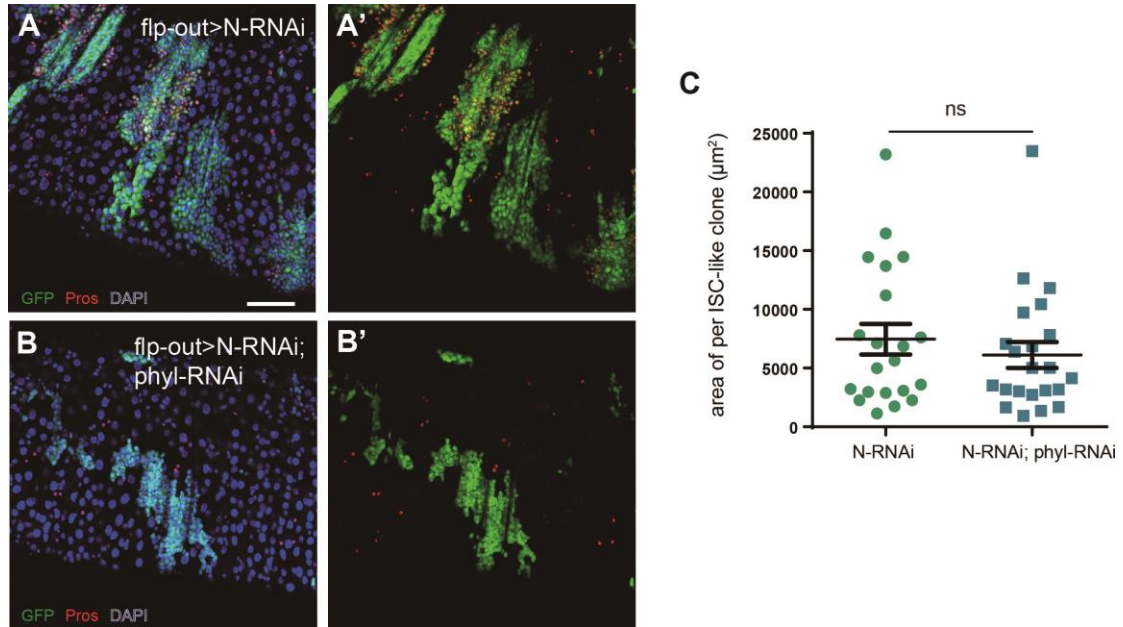

**Fig. S7, Related to Figure 6. Depletion of *phyl* blocks *Notch*-loss-induced EE-like tumor fomration.**

(A-B) N-RNAi and *phyl*, N double RNAi clones were generated by the flp-out system and were examined on 14 day ACI. Clones co-stained with anti-Pros (red). Dashed lines depict the clone margin. Note the absence of EE-like tumors in *phyl*, N double RNAi clones, while ISC-like tumors still could be formed.

(C) Quantification of ISC-like tumor size in N-RNAi and *phyl*, N double RNAi clones. Mean  $\pm$  s.e.m. n=21 for N-RNAi clones, and n=22 for *phyl*, N double RNAi clones. ns, no significant difference.

Scale bar: 20  $\mu\text{m}$ .
